# Supplementary material for: Influence of Genetic Background and Tissue Types on Global DNA Methylation Patterns
Source: PLoS One. 2010 Feb 23;5(2):e9355. doi: 10.1371/journal.pone.0009355 (PMC2826396; doi:10.1371/journal.pone.0009355)
Supplement: Table S1 — Statistical analysis of data in Figure S1. B, N and T are abbreviations for blood, normal and tumor samples. B-N-T represents all samples. The arrows in Figure S1 are defined in the first column of the table. The variances of the angles in the methylation data are significantly smaller than those in the DNA data based on the F-test. (0.02 MB XLS) [file pone.0009355.s002.xls]

## Sheet: supplementary_table1
definition of arrow	sd.methyl	sd.gDNA	F statistics	p.value	data source
N to B in PCA of B and N	0.351	1.1	9.83	1.17e-08	Figures S1a and S1b
N to B in PCA of B-N-T	0.43	1.15	7.11	5.02e-07	Figures S1c and S1d
T to B in PCA of B-N-T	0.275	1.2	18.9	2.97e-12	Figures S1e and S1f
