# Supplementary material for: Influence of Genetic Background and Tissue Types on Global DNA Methylation Patterns
Source: PLoS One. 2010 Feb 23;5(2):e9355. doi: 10.1371/journal.pone.0009355 (PMC2826396; doi:10.1371/journal.pone.0009355)
Supplement: Table S3 — Correlation coefficients for DNA experiments. Data are described in Results and Discussion as well as Materials and Methods. (0.16 MB XLS) [file pone.0009355.s004.xls]

## Sheet: gDNA.cor.BNT
B1	B2	B3	B4	B5	B6	B7	B8	B9	B10	B11	B12	B13	B14	B15	B16	B17	B18	B19	B20	B21	B22	B23	B24	B25	B26	B27	B28	B29	B30	N1	N2	N3	N4	N5	N6	N7	N8	N9	N10	N11	N12	N13	N14	N15	N16	N17	N18	N19	N20
B1	1	0.748	0.856	0.843	0.835	0.848	0.839	0.809	0.838	0.842	0.824	0.815	0.739	0.836	0.784	0.837	0.857	0.841	0.834	0.685	0.758	0.852	0.856	0.824	0.744	0.843	0.83	0.846	0.852	0.835	0.916	0.789	0.785	0.832	0.812	0.638	0.821	0.807	0.827	0.803	0.834	0.779	0.84	0.775	0.799	0.794	0.804	0.841	0.804
B2	0.748	1	0.739	0.749	0.76	0.735	0.757	0.747	0.714	0.726	0.745	0.742	0.71	0.748	0.707	0.721	0.751	0.731	0.696	0.758	0.813	0.713	0.735	0.735	0.802	0.727	0.735	0.717	0.748	0.748	0.725	0.838	0.676	0.716	0.711	0.635	0.691	0.68	0.735	0.721	0.739	0.689	0.724	0.668	0.697	0.702	0.665	0.735	0.752
B3	0.856	0.739	1	0.836	0.828	0.84	0.834	0.805	0.831	0.841	0.82	0.809	0.749	0.842	0.784	0.827	0.852	0.85	0.833	0.695	0.775	0.858	0.848	0.824	0.759	0.841	0.839	0.836	0.841	0.843	0.835	0.802	0.871	0.835	0.818	0.657	0.821	0.813	0.836	0.827	0.833	0.781	0.843	0.786	0.807	0.8	0.809	0.842	0.816
B4	0.843	0.749	0.836	1	0.842	0.818	0.847	0.831	0.798	0.811	0.823	0.831	0.779	0.843	0.822	0.801	0.835	0.842	0.784	0.71	0.779	0.816	0.829	0.832	0.776	0.813	0.841	0.802	0.834	0.839	0.809	0.812	0.781	0.89	0.796	0.7	0.797	0.775	0.8	0.812	0.827	0.775	0.812	0.762	0.785	0.782	0.76	0.807	0.81
B5	0.835	0.76	0.828	0.842	1	0.816	0.853	0.829	0.79	0.809	0.83	0.842	0.796	0.842	0.806	0.802	0.84	0.839	0.769	0.723	0.784	0.795	0.821	0.818	0.782	0.804	0.848	0.8	0.836	0.841	0.807	0.806	0.784	0.802	0.879	0.712	0.792	0.782	0.798	0.807	0.825	0.774	0.81	0.776	0.795	0.784	0.771	0.8	0.809
B6	0.848	0.735	0.84	0.818	0.816	1	0.831	0.792	0.84	0.843	0.823	0.799	0.733	0.818	0.736	0.842	0.84	0.822	0.836	0.654	0.732	0.834	0.845	0.8	0.714	0.842	0.81	0.844	0.838	0.818	0.827	0.746	0.78	0.831	0.802	0.682	0.802	0.813	0.818	0.78	0.81	0.768	0.824	0.787	0.809	0.783	0.817	0.835	0.804
B7	0.839	0.757	0.834	0.847	0.853	0.831	1	0.835	0.806	0.825	0.844	0.846	0.795	0.842	0.798	0.817	0.84	0.838	0.786	0.71	0.773	0.803	0.831	0.823	0.768	0.82	0.847	0.811	0.843	0.846	0.819	0.795	0.79	0.817	0.799	0.705	0.799	0.793	0.806	0.812	0.828	0.787	0.818	0.784	0.804	0.795	0.783	0.811	0.821
B8	0.809	0.747	0.805	0.831	0.829	0.792	0.835	1	0.769	0.783	0.824	0.837	0.798	0.829	0.792	0.765	0.804	0.827	0.735	0.716	0.772	0.779	0.8	0.826	0.771	0.775	0.83	0.754	0.809	0.822	0.783	0.799	0.77	0.76	0.769	0.736	0.759	0.838	0.77	0.8	0.801	0.766	0.775	0.754	0.77	0.763	0.732	0.769	0.807
B9	0.838	0.714	0.831	0.798	0.79	0.84	0.806	0.769	1	0.837	0.802	0.776	0.698	0.798	0.714	0.836	0.822	0.804	0.842	0.621	0.712	0.834	0.834	0.779	0.688	0.841	0.786	0.842	0.825	0.797	0.818	0.726	0.768	0.828	0.793	0.57	0.79	0.811	0.9	0.761	0.795	0.756	0.819	0.778	0.797	0.769	0.815	0.834	0.791
B10	0.842	0.726	0.841	0.811	0.809	0.843	0.825	0.783	0.837	1	0.814	0.793	0.731	0.809	0.731	0.836	0.833	0.818	0.833	0.647	0.727	0.83	0.839	0.795	0.707	0.842	0.807	0.841	0.832	0.814	0.823	0.74	0.771	0.831	0.793	0.603	0.798	0.811	0.812	0.872	0.807	0.763	0.822	0.783	0.803	0.776	0.816	0.834	0.794
B11	0.824	0.745	0.82	0.823	0.83	0.823	0.844	0.824	0.802	0.814	1	0.835	0.785	0.828	0.754	0.803	0.823	0.828	0.775	0.693	0.75	0.798	0.82	0.812	0.743	0.804	0.83	0.794	0.824	0.827	0.811	0.766	0.78	0.797	0.784	0.688	0.78	0.789	0.792	0.79	0.892	0.78	0.794	0.787	0.804	0.777	0.784	0.797	0.812
B12	0.815	0.742	0.809	0.831	0.842	0.799	0.846	0.837	0.776	0.793	0.835	1	0.797	0.833	0.792	0.781	0.82	0.834	0.746	0.711	0.772	0.783	0.805	0.81	0.768	0.784	0.841	0.773	0.823	0.827	0.791	0.795	0.782	0.777	0.772	0.726	0.774	0.773	0.781	0.795	0.807	0.863	0.788	0.775	0.791	0.77	0.758	0.778	0.812
B13	0.739	0.71	0.749	0.779	0.796	0.733	0.795	0.798	0.698	0.731	0.785	0.797	1	0.786	0.735	0.696	0.752	0.772	0.653	0.705	0.727	0.695	0.738	0.787	0.73	0.706	0.802	0.681	0.742	0.79	0.728	0.739	0.729	0.696	0.708	0.752	0.692	0.704	0.693	0.784	0.742	0.711	0.77	0.73	0.73	0.703	0.682	0.696	0.759
B14	0.836	0.748	0.842	0.843	0.842	0.818	0.842	0.829	0.798	0.809	0.828	0.833	0.786	1	0.806	0.799	0.842	0.852	0.779	0.721	0.787	0.815	0.824	0.824	0.782	0.807	0.851	0.795	0.833	0.845	0.818	0.813	0.791	0.803	0.804	0.721	0.802	0.781	0.813	0.82	0.826	0.782	0.816	0.867	0.795	0.791	0.776	0.807	0.819
B15	0.784	0.707	0.784	0.822	0.806	0.736	0.798	0.792	0.714	0.731	0.754	0.792	0.735	0.806	1	0.727	0.794	0.804	0.705	0.713	0.787	0.759	0.763	0.782	0.792	0.744	0.808	0.724	0.784	0.799	0.749	0.835	0.742	0.744	0.759	0.717	0.764	0.704	0.762	0.794	0.799	0.731	0.781	0.686	0.795	0.753	0.678	0.75	0.773
B16	0.837	0.721	0.827	0.801	0.802	0.842	0.817	0.765	0.836	0.836	0.803	0.781	0.696	0.799	0.727	1	0.834	0.799	0.842	0.626	0.721	0.823	0.833	0.768	0.704	0.844	0.785	0.854	0.837	0.799	0.816	0.724	0.757	0.833	0.793	0.569	0.793	0.807	0.816	0.756	0.797	0.755	0.825	0.769	0.799	0.86	0.814	0.834	0.793
B17	0.857	0.751	0.852	0.835	0.84	0.84	0.84	0.804	0.822	0.833	0.823	0.82	0.752	0.842	0.794	0.834	1	0.843	0.818	0.697	0.773	0.84	0.845	0.808	0.761	0.835	0.841	0.84	0.853	0.841	0.833	0.801	0.789	0.831	0.812	0.663	0.825	0.806	0.834	0.812	0.835	0.782	0.85	0.778	0.804	0.806	0.882	0.834	0.814
B18	0.841	0.731	0.85	0.842	0.839	0.822	0.838	0.827	0.804	0.818	0.828	0.834	0.772	0.852	0.804	0.799	0.843	1	0.786	0.716	0.779	0.831	0.827	0.829	0.771	0.811	0.861	0.799	0.833	0.846	0.82	0.817	0.803	0.807	0.805	0.713	0.814	0.796	0.818	0.827	0.828	0.788	0.822	0.79	0.806	0.794	0.791	0.895	0.816
B19	0.834	0.696	0.833	0.784	0.769	0.836	0.786	0.735	0.842	0.833	0.775	0.746	0.653	0.779	0.705	0.842	0.818	0.786	1	0.592	0.698	0.84	0.831	0.755	0.673	0.847	0.763	0.855	0.82	0.779	0.811	0.714	0.749	0.835	0.789	0.516	0.793	0.806	0.821	0.746	0.786	0.737	0.825	0.762	0.789	0.762	0.813	0.842	0.867
B20	0.685	0.758	0.695	0.71	0.723	0.654	0.71	0.716	0.621	0.647	0.693	0.711	0.705	0.721	0.713	0.626	0.697	0.716	0.592	1	0.805	0.649	0.668	0.708	0.801	0.637	0.729	0.62	0.683	0.721	0.671	0.776	0.658	0.641	0.668	0.704	0.649	0.62	0.682	0.717	0.696	0.66	0.671	0.625	0.651	0.672	0.6	0.655	0.705
B21	0.758	0.813	0.775	0.779	0.784	0.732	0.773	0.772	0.712	0.727	0.75	0.772	0.727	0.787	0.787	0.721	0.773	0.779	0.698	0.805	1	0.742	0.741	0.754	0.872	0.733	0.783	0.714	0.764	0.781	0.745	0.84	0.723	0.736	0.746	0.703	0.73	0.697	0.773	0.777	0.77	0.719	0.761	0.686	0.718	0.741	0.677	0.751	0.788
B22	0.852	0.713	0.858	0.816	0.795	0.834	0.803	0.779	0.834	0.83	0.798	0.783	0.695	0.815	0.759	0.823	0.84	0.831	0.84	0.649	0.742	1	0.844	0.807	0.718	0.835	0.806	0.836	0.834	0.812	0.824	0.779	0.783	0.825	0.808	0.601	0.816	0.805	0.828	0.8	0.817	0.769	0.84	0.761	0.787	0.788	0.798	0.847	0.798
B23	0.856	0.735	0.848	0.829	0.821	0.845	0.831	0.8	0.834	0.839	0.82	0.805	0.738	0.824	0.763	0.833	0.845	0.827	0.831	0.668	0.741	0.844	1	0.817	0.726	0.839	0.818	0.84	0.842	0.825	0.824	0.768	0.78	0.826	0.802	0.627	0.806	0.805	0.815	0.795	0.819	0.771	0.83	0.771	0.796	0.784	0.799	0.835	0.803
B24	0.824	0.735	0.824	0.832	0.818	0.8	0.823	0.826	0.779	0.795	0.812	0.81	0.787	0.824	0.782	0.768	0.808	0.829	0.755	0.708	0.754	0.807	0.817	1	0.746	0.785	0.823	0.764	0.804	0.827	0.788	0.792	0.769	0.768	0.777	0.712	0.764	0.755	0.766	0.814	0.801	0.756	0.776	0.744	0.76	0.76	0.736	0.786	0.791
B25	0.744	0.802	0.759	0.776	0.782	0.714	0.768	0.771	0.688	0.707	0.743	0.768	0.73	0.782	0.792	0.704	0.761	0.771	0.673	0.801	0.872	0.718	0.726	0.746	1	0.715	0.778	0.692	0.752	0.778	0.73	0.836	0.707	0.715	0.735	0.72	0.715	0.671	0.757	0.772	0.763	0.708	0.744	0.667	0.701	0.731	0.646	0.731	0.779
B26	0.843	0.727	0.841	0.813	0.804	0.842	0.82	0.775	0.841	0.842	0.804	0.784	0.706	0.807	0.744	0.844	0.835	0.811	0.847	0.637	0.733	0.835	0.839	0.785	0.715	1	0.799	0.849	0.834	0.809	0.823	0.748	0.768	0.838	0.803	0.586	0.802	0.809	0.822	0.78	0.809	0.763	0.831	0.771	0.797	0.78	0.812	0.843	0.799
B27	0.83	0.735	0.839	0.841	0.848	0.81	0.847	0.83	0.786	0.807	0.83	0.841	0.802	0.851	0.808	0.785	0.841	0.861	0.763	0.729	0.783	0.806	0.818	0.823	0.778	0.799	1	0.787	0.826	0.85	0.815	0.818	0.801	0.801	0.797	0.736	0.808	0.788	0.805	0.827	0.826	0.783	0.816	0.79	0.801	0.794	0.781	0.8	0.814
B28	0.846	0.717	0.836	0.802	0.8	0.844	0.811	0.754	0.842	0.841	0.794	0.773	0.681	0.795	0.724	0.854	0.84	0.799	0.855	0.62	0.714	0.836	0.84	0.764	0.692	0.849	0.787	1	0.84	0.801	0.819	0.728	0.761	0.845	0.793	0.542	0.804	0.817	0.822	0.756	0.802	0.75	0.836	0.771	0.796	0.777	0.821	0.843	0.781
B29	0.852	0.748	0.841	0.834	0.836	0.838	0.843	0.809	0.825	0.832	0.824	0.823	0.742	0.833	0.784	0.837	0.853	0.833	0.82	0.683	0.764	0.834	0.842	0.804	0.752	0.834	0.826	0.84	1	0.827	0.82	0.78	0.779	0.826	0.799	0.641	0.807	0.805	0.82	0.794	0.824	0.774	0.832	0.776	0.8	0.786	0.797	0.831	0.811
B30	0.835	0.748	0.843	0.839	0.841	0.818	0.846	0.822	0.797	0.814	0.827	0.827	0.79	0.845	0.799	0.799	0.841	0.846	0.779	0.721	0.781	0.812	0.825	0.827	0.778	0.809	0.85	0.801	0.827	1	0.818	0.807	0.788	0.808	0.803	0.713	0.806	0.785	0.814	0.826	0.828	0.781	0.82	0.777	0.797	0.795	0.776	0.81	0.81
N1	0.916	0.725	0.835	0.809	0.807	0.827	0.819	0.783	0.818	0.823	0.811	0.791	0.728	0.818	0.749	0.816	0.833	0.82	0.811	0.671	0.745	0.824	0.824	0.788	0.73	0.823	0.815	0.819	0.82	0.818	1	0.766	0.812	0.828	0.838	0.667	0.819	0.818	0.837	0.802	0.813	0.812	0.838	0.792	0.812	0.828	0.812	0.834	0.806
N2	0.789	0.838	0.802	0.812	0.806	0.746	0.795	0.799	0.726	0.74	0.766	0.795	0.739	0.813	0.835	0.724	0.801	0.817	0.714	0.776	0.84	0.779	0.768	0.792	0.836	0.748	0.818	0.728	0.78	0.807	0.766	1	0.763	0.749	0.771	0.734	0.771	0.727	0.792	0.808	0.804	0.748	0.796	0.71	0.738	0.77	0.695	0.767	0.795
N3	0.785	0.676	0.871	0.781	0.784	0.78	0.79	0.77	0.768	0.771	0.78	0.782	0.729	0.791	0.742	0.757	0.789	0.803	0.749	0.658	0.723	0.783	0.78	0.769	0.707	0.768	0.801	0.761	0.779	0.788	0.812	0.763	1	0.775	0.828	0.719	0.79	0.829	0.802	0.777	0.776	0.827	0.802	0.809	0.813	0.827	0.799	0.794	0.785
N4	0.832	0.716	0.835	0.89	0.802	0.831	0.817	0.76	0.828	0.831	0.797	0.777	0.696	0.803	0.744	0.833	0.831	0.807	0.835	0.641	0.736	0.825	0.826	0.768	0.715	0.838	0.801	0.845	0.826	0.808	0.828	0.749	0.775	1	0.803	0.586	0.812	0.813	0.828	0.777	0.81	0.763	0.842	0.778	0.804	0.791	0.814	0.838	0.794
N5	0.812	0.711	0.818	0.796	0.879	0.802	0.799	0.769	0.793	0.793	0.784	0.772	0.708	0.804	0.759	0.793	0.812	0.805	0.789	0.668	0.746	0.808	0.802	0.777	0.735	0.803	0.797	0.793	0.799	0.803	0.838	0.771	0.828	0.803	1	0.694	0.808	0.803	0.829	0.793	0.798	0.83	0.829	0.765	0.795	0.844	0.781	0.827	0.796
N6	0.638	0.635	0.657	0.7	0.712	0.682	0.705	0.736	0.57	0.603	0.688	0.726	0.752	0.721	0.717	0.569	0.663	0.713	0.516	0.704	0.703	0.601	0.627	0.712	0.72	0.586	0.736	0.542	0.641	0.713	0.667	0.734	0.719	0.586	0.694	1	0.64	0.614	0.641	0.735	0.67	0.724	0.633	0.638	0.648	0.706	0.572	0.61	0.693
N7	0.821	0.691	0.821	0.797	0.792	0.802	0.799	0.759	0.79	0.798	0.78	0.774	0.692	0.802	0.764	0.793	0.825	0.814	0.793	0.649	0.73	0.816	0.806	0.764	0.715	0.802	0.808	0.804	0.807	0.806	0.819	0.771	0.79	0.812	0.808	0.64	1	0.797	0.823	0.783	0.816	0.782	0.84	0.763	0.789	0.81	0.791	0.813	0.773
N8	0.807	0.68	0.813	0.775	0.782	0.813	0.793	0.838	0.811	0.811	0.789	0.773	0.704	0.781	0.704	0.807	0.806	0.796	0.806	0.62	0.697	0.805	0.805	0.755	0.671	0.809	0.788	0.817	0.805	0.785	0.818	0.727	0.829	0.813	0.803	0.614	0.797	1	0.817	0.759	0.778	0.788	0.822	0.838	0.839	0.799	0.846	0.818	0.786
N9	0.827	0.735	0.836	0.8	0.798	0.818	0.806	0.77	0.9	0.812	0.792	0.781	0.693	0.813	0.762	0.816	0.834	0.818	0.821	0.682	0.773	0.828	0.815	0.766	0.757	0.822	0.805	0.822	0.82	0.814	0.837	0.792	0.802	0.828	0.829	0.641	0.823	0.817	1	0.79	0.811	0.794	0.852	0.786	0.815	0.823	0.806	0.836	0.813
N10	0.803	0.721	0.827	0.812	0.807	0.78	0.812	0.8	0.761	0.872	0.79	0.795	0.784	0.82	0.794	0.756	0.812	0.827	0.746	0.717	0.777	0.8	0.795	0.814	0.772	0.78	0.827	0.756	0.794	0.826	0.802	0.808	0.777	0.777	0.793	0.735	0.783	0.759	0.79	1	0.806	0.771	0.8	0.745	0.764	0.781	0.738	0.791	0.799
N11	0.834	0.739	0.833	0.827	0.825	0.81	0.828	0.801	0.795	0.807	0.892	0.807	0.742	0.826	0.799	0.797	0.835	0.828	0.786	0.696	0.77	0.817	0.819	0.801	0.763	0.809	0.826	0.802	0.824	0.828	0.813	0.804	0.776	0.81	0.798	0.67	0.816	0.778	0.811	0.806	1	0.771	0.827	0.753	0.78	0.79	0.766	0.813	0.795
N12	0.779	0.689	0.781	0.775	0.774	0.768	0.787	0.766	0.756	0.763	0.78	0.863	0.711	0.782	0.731	0.755	0.782	0.788	0.737	0.66	0.719	0.769	0.771	0.756	0.708	0.763	0.783	0.75	0.774	0.781	0.812	0.748	0.827	0.763	0.83	0.724	0.782	0.788	0.794	0.771	0.771	1	0.788	0.758	0.783	0.832	0.76	0.789	0.772
N13	0.84	0.724	0.843	0.812	0.81	0.824	0.818	0.775	0.819	0.822	0.794	0.788	0.77	0.816	0.781	0.825	0.85	0.822	0.825	0.671	0.761	0.84	0.83	0.776	0.744	0.831	0.816	0.836	0.832	0.82	0.838	0.796	0.802	0.842	0.829	0.633	0.84	0.822	0.852	0.8	0.827	0.788	1	0.776	0.802	0.828	0.809	0.843	0.803
N14	0.775	0.668	0.786	0.762	0.776	0.787	0.784	0.754	0.778	0.783	0.787	0.775	0.73	0.867	0.686	0.769	0.778	0.79	0.762	0.625	0.686	0.761	0.771	0.744	0.667	0.771	0.79	0.771	0.776	0.777	0.792	0.71	0.809	0.778	0.765	0.638	0.763	0.838	0.786	0.745	0.753	0.758	0.776	1	0.838	0.758	0.832	0.772	0.781
N15	0.799	0.697	0.807	0.785	0.795	0.809	0.804	0.77	0.797	0.803	0.804	0.791	0.73	0.795	0.795	0.799	0.804	0.806	0.789	0.651	0.718	0.787	0.796	0.76	0.701	0.797	0.801	0.796	0.8	0.797	0.812	0.738	0.813	0.804	0.795	0.648	0.789	0.839	0.815	0.764	0.78	0.783	0.802	0.838	1	0.787	0.834	0.801	0.802
N16	0.794	0.702	0.8	0.782	0.784	0.783	0.795	0.763	0.769	0.776	0.777	0.77	0.703	0.791	0.753	0.86	0.806	0.794	0.762	0.672	0.741	0.788	0.784	0.76	0.731	0.78	0.794	0.777	0.786	0.795	0.828	0.77	0.827	0.791	0.844	0.706	0.81	0.799	0.823	0.781	0.79	0.832	0.828	0.758	0.787	1	0.773	0.809	0.783
N17	0.804	0.665	0.809	0.76	0.771	0.817	0.783	0.732	0.815	0.816	0.784	0.758	0.682	0.776	0.678	0.814	0.882	0.791	0.813	0.6	0.677	0.798	0.799	0.736	0.646	0.812	0.781	0.821	0.797	0.776	0.812	0.695	0.799	0.814	0.781	0.572	0.791	0.846	0.806	0.738	0.766	0.76	0.809	0.832	0.834	0.773	1	0.809	0.769
N18	0.841	0.735	0.842	0.807	0.8	0.835	0.811	0.769	0.834	0.834	0.797	0.778	0.696	0.807	0.75	0.834	0.834	0.895	0.842	0.655	0.751	0.847	0.835	0.786	0.731	0.843	0.8	0.843	0.831	0.81	0.834	0.767	0.794	0.838	0.827	0.61	0.813	0.818	0.836	0.791	0.813	0.789	0.843	0.772	0.801	0.809	0.809	1	0.803
N19	0.804	0.752	0.816	0.81	0.809	0.804	0.821	0.807	0.791	0.794	0.812	0.812	0.759	0.819	0.773	0.793	0.814	0.816	0.867	0.705	0.788	0.798	0.803	0.791	0.779	0.799	0.814	0.781	0.811	0.81	0.806	0.795	0.785	0.794	0.796	0.693	0.773	0.786	0.813	0.799	0.795	0.772	0.803	0.781	0.802	0.783	0.769	0.803	1
N20	0.807	0.693	0.819	0.793	0.796	0.803	0.802	0.771	0.795	0.799	0.792	0.789	0.724	0.805	0.748	0.79	0.812	0.818	0.79	0.723	0.74	0.804	0.801	0.771	0.723	0.801	0.812	0.795	0.802	0.804	0.824	0.77	0.842	0.806	0.822	0.678	0.807	0.841	0.834	0.787	0.792	0.804	0.824	0.832	0.837	0.816	0.823	0.816	0.805
N21	0.81	0.719	0.816	0.808	0.816	0.797	0.816	0.796	0.78	0.79	0.801	0.811	0.759	0.818	0.779	0.777	0.822	0.824	0.767	0.703	0.843	0.794	0.799	0.788	0.756	0.787	0.829	0.781	0.807	0.816	0.818	0.801	0.833	0.798	0.81	0.718	0.802	0.826	0.825	0.804	0.803	0.799	0.822	0.82	0.826	0.812	0.799	0.801	0.814
N22	0.804	0.71	0.821	0.804	0.815	0.807	0.828	0.798	0.794	0.807	0.818	0.816	0.778	0.814	0.752	0.788	0.814	0.824	0.773	0.682	0.747	0.855	0.802	0.788	0.73	0.799	0.829	0.79	0.807	0.817	0.824	0.772	0.845	0.804	0.813	0.708	0.795	0.839	0.811	0.808	0.795	0.809	0.814	0.836	0.835	0.811	0.822	0.81	0.819
N23	0.824	0.734	0.823	0.807	0.818	0.822	0.833	0.796	0.808	0.815	0.822	0.818	0.736	0.814	0.757	0.816	0.833	0.818	0.801	0.676	0.753	0.808	0.903	0.777	0.742	0.813	0.818	0.816	0.828	0.816	0.821	0.773	0.788	0.82	0.798	0.65	0.802	0.811	0.828	0.781	0.809	0.78	0.831	0.794	0.818	0.797	0.8	0.814	0.818
N24	0.817	0.739	0.835	0.816	0.815	0.805	0.817	0.805	0.79	0.801	0.808	0.805	0.759	0.83	0.776	0.792	0.823	0.833	0.782	0.706	0.779	0.817	0.81	0.891	0.77	0.8	0.824	0.783	0.812	0.826	0.817	0.799	0.796	0.796	0.809	0.708	0.793	0.792	0.824	0.823	0.811	0.787	0.811	0.785	0.804	0.795	0.778	0.812	0.819
N25	0.802	0.673	0.816	0.777	0.777	0.803	0.786	0.753	0.803	0.804	0.782	0.769	0.701	0.788	0.717	0.794	0.802	0.804	0.799	0.63	0.71	0.809	0.798	0.759	0.756	0.802	0.794	0.801	0.795	0.788	0.828	0.737	0.853	0.809	0.828	0.649	0.805	0.852	0.821	0.773	0.78	0.811	0.823	0.824	0.828	0.824	0.836	0.825	0.788
N26	0.804	0.763	0.817	0.794	0.795	0.801	0.809	0.772	0.793	0.8	0.79	0.78	0.723	0.801	0.764	0.798	0.817	0.802	0.787	0.714	0.798	0.799	0.797	0.765	0.783	0.899	0.801	0.797	0.802	0.807	0.827	0.797	0.803	0.812	0.826	0.677	0.801	0.802	0.838	0.798	0.801	0.797	0.831	0.772	0.801	0.824	0.787	0.827	0.818
N27	0.819	0.705	0.831	0.797	0.791	0.822	0.805	0.765	0.82	0.816	0.793	0.779	0.698	0.802	0.744	0.821	0.821	0.814	0.829	0.643	0.743	0.824	0.814	0.765	0.723	0.83	0.882	0.825	0.818	0.8	0.825	0.765	0.808	0.829	0.813	0.613	0.804	0.833	0.84	0.78	0.795	0.775	0.835	0.811	0.827	0.794	0.825	0.836	0.817
N28	0.819	0.725	0.832	0.804	0.799	0.811	0.807	0.777	0.803	0.803	0.789	0.787	0.701	0.815	0.775	0.812	0.83	0.819	0.808	0.681	0.773	0.825	0.809	0.77	0.764	0.816	0.807	0.894	0.82	0.811	0.826	0.793	0.791	0.818	0.823	0.659	0.807	0.801	0.848	0.807	0.807	0.79	0.841	0.772	0.804	0.807	0.787	0.829	0.821
N29	0.754	0.684	0.766	0.766	0.767	0.745	0.779	0.769	0.722	0.744	0.77	0.769	0.766	0.776	0.724	0.709	0.76	0.777	0.692	0.683	0.711	0.742	0.748	0.78	0.705	0.727	0.788	0.708	0.822	0.78	0.786	0.742	0.802	0.728	0.794	0.759	0.751	0.757	0.752	0.792	0.757	0.812	0.75	0.745	0.757	0.799	0.726	0.752	0.756
N30	0.806	0.68	0.82	0.781	0.783	0.812	0.792	0.76	0.817	0.808	0.787	0.779	0.693	0.788	0.721	0.81	0.805	0.805	0.812	0.619	0.714	0.816	0.806	0.758	0.69	0.812	0.791	0.816	0.808	0.867	0.803	0.74	0.811	0.815	0.786	0.592	0.786	0.846	0.816	0.76	0.778	0.755	0.82	0.826	0.827	0.77	0.836	0.819	0.799
T1	0.883	0.731	0.817	0.811	0.813	0.799	0.819	0.814	0.779	0.787	0.815	0.814	0.772	0.825	0.768	0.774	0.813	0.828	0.754	0.708	0.766	0.796	0.797	0.803	0.76	0.782	0.826	0.764	0.805	0.816	0.894	0.793	0.792	0.781	0.798	0.729	0.784	0.781	0.802	0.811	0.803	0.786	0.798	0.776	0.795	0.785	0.768	0.788	0.815
T2	0.744	0.729	0.756	0.773	0.757	0.702	0.753	0.754	0.678	0.691	0.719	0.75	0.7	0.773	0.808	0.681	0.757	0.776	0.666	0.692	0.757	0.735	0.722	0.749	0.761	0.701	0.777	0.681	0.736	0.766	0.725	0.862	0.72	0.704	0.735	0.71	0.756	0.673	0.74	0.774	0.784	0.712	0.754	0.656	0.69	0.732	0.646	0.717	0.741
T3	0.785	0.684	0.87	0.792	0.798	0.776	0.798	0.783	0.761	0.771	0.789	0.799	0.754	0.801	0.757	0.753	0.792	0.812	0.739	0.677	0.74	0.775	0.777	0.775	0.726	0.765	0.818	0.754	0.783	0.798	0.795	0.776	0.909	0.775	0.789	0.712	0.782	0.82	0.79	0.785	0.784	0.782	0.794	0.822	0.816	0.784	0.799	0.776	0.792
T4	0.817	0.722	0.823	0.89	0.801	0.818	0.818	0.768	0.809	0.816	0.798	0.779	0.722	0.803	0.749	0.814	0.821	0.801	0.807	0.658	0.744	0.805	0.812	0.771	0.728	0.819	0.8	0.819	0.814	0.811	0.822	0.753	0.769	0.933	0.8	0.621	0.802	0.796	0.816	0.79	0.806	0.762	0.827	0.772	0.798	0.788	0.792	0.819	0.8
T5	0.826	0.721	0.835	0.812	0.895	0.82	0.816	0.787	0.807	0.814	0.803	0.791	0.734	0.819	0.763	0.809	0.827	0.823	0.801	0.68	0.751	0.82	0.819	0.796	0.738	0.816	0.816	0.808	0.816	0.818	0.819	0.775	0.782	0.817	0.89	0.656	0.805	0.796	0.815	0.806	0.816	0.77	0.823	0.775	0.799	0.788	0.791	0.817	0.804
T6	0.746	0.69	0.76	0.775	0.778	0.807	0.779	0.784	0.696	0.718	0.762	0.778	0.76	0.791	0.764	0.699	0.761	0.789	0.665	0.71	0.746	0.722	0.733	0.771	0.753	0.711	0.795	0.679	0.743	0.784	0.747	0.775	0.744	0.707	0.745	0.855	0.725	0.704	0.736	0.791	0.766	0.739	0.736	0.716	0.735	0.736	0.688	0.715	0.767
T7	0.805	0.7	0.819	0.8	0.785	0.792	0.797	0.784	0.783	0.788	0.791	0.781	0.733	0.807	0.76	0.771	0.802	0.818	0.771	0.678	0.742	0.809	0.795	0.799	0.731	0.789	0.807	0.769	0.788	0.808	0.827	0.78	0.835	0.785	0.84	0.722	0.874	0.802	0.814	0.803	0.793	0.826	0.814	0.772	0.792	0.837	0.776	0.815	0.798
T8	0.784	0.668	0.798	0.762	0.772	0.796	0.785	0.832	0.789	0.797	0.783	0.766	0.718	0.778	0.692	0.783	0.783	0.793	0.773	0.625	0.691	0.777	0.781	0.749	0.666	0.787	0.788	0.786	0.78	0.78	0.801	0.71	0.812	0.792	0.777	0.629	0.781	0.924	0.792	0.757	0.766	0.765	0.792	0.84	0.831	0.772	0.841	0.79	0.772
T9	0.791	0.696	0.804	0.785	0.782	0.782	0.796	0.775	0.845	0.775	0.782	0.777	0.726	0.797	0.751	0.763	0.801	0.803	0.75	0.676	0.734	0.785	0.783	0.779	0.724	0.77	0.8	0.762	0.784	0.802	0.8	0.767	0.777	0.777	0.792	0.689	0.799	0.771	0.876	0.795	0.803	0.775	0.801	0.752	0.773	0.79	0.756	0.783	0.782
T10	0.824	0.718	0.837	0.81	0.804	0.811	0.814	0.786	0.8	0.899	0.796	0.792	0.72	0.823	0.782	0.802	0.832	0.831	0.796	0.686	0.77	0.823	0.812	0.787	0.76	0.814	0.82	0.801	0.816	0.82	0.833	0.795	0.803	0.816	0.828	0.687	0.822	0.798	0.837	0.904	0.82	0.796	0.841	0.773	0.8	0.815	0.791	0.826	0.813
T11	0.812	0.73	0.814	0.825	0.82	0.781	0.819	0.799	0.762	0.778	0.864	0.805	0.75	0.819	0.824	0.767	0.818	0.817	0.754	0.707	0.781	0.794	0.797	0.795	0.778	0.784	0.821	0.77	0.809	0.819	0.79	0.822	0.765	0.785	0.785	0.699	0.801	0.752	0.792	0.813	0.93	0.762	0.809	0.73	0.76	0.774	0.728	0.79	0.789
T12	0.827	0.708	0.825	0.808	0.8	0.81	0.811	0.771	0.802	0.807	0.789	0.863	0.71	0.805	0.769	0.802	0.823	0.811	0.802	0.656	0.737	0.816	0.815	0.779	0.725	0.812	0.805	0.81	0.812	0.81	0.82	0.776	0.786	0.815	0.811	0.638	0.823	0.8	0.82	0.79	0.819	0.862	0.833	0.765	0.792	0.802	0.786	0.819	0.785
T13	0.81	0.717	0.82	0.801	0.793	0.79	0.801	0.78	0.777	0.785	0.784	0.781	0.793	0.808	0.778	0.776	0.817	0.809	0.773	0.684	0.758	0.811	0.801	0.784	0.747	0.789	0.807	0.78	0.797	0.809	0.818	0.799	0.799	0.795	0.821	0.69	0.813	0.786	0.821	0.806	0.813	0.794	0.911	0.749	0.775	0.825	0.76	0.81	0.793
T14	0.777	0.657	0.787	0.758	0.757	0.78	0.766	0.74	0.775	0.774	0.765	0.754	0.693	0.847	0.695	0.765	0.773	0.782	0.766	0.618	0.683	0.774	0.77	0.743	0.66	0.769	0.77	0.769	0.771	0.762	0.788	0.714	0.814	0.776	0.775	0.627	0.769	0.832	0.782	0.744	0.755	0.76	0.782	0.909	0.819	0.764	0.825	0.782	0.766
T15	0.783	0.677	0.794	0.769	0.779	0.798	0.79	0.757	0.786	0.795	0.791	0.776	0.721	0.783	0.767	0.786	0.79	0.792	0.77	0.629	0.694	0.773	0.782	0.747	0.673	0.784	0.788	0.782	0.784	0.781	0.799	0.711	0.799	0.792	0.777	0.637	0.787	0.824	0.787	0.75	0.769	0.769	0.789	0.825	0.907	0.773	0.831	0.784	0.778
T16	0.803	0.672	0.808	0.765	0.759	0.794	0.767	0.721	0.792	0.79	0.749	0.735	0.642	0.773	0.726	0.875	0.805	0.781	0.806	0.618	0.712	0.806	0.79	0.733	0.692	0.799	0.766	0.808	0.789	0.774	0.8	0.737	0.751	0.808	0.788	0.571	0.81	0.781	0.815	0.753	0.788	0.742	0.829	0.738	0.766	0.851	0.784	0.81	0.76
T17	0.779	0.659	0.785	0.759	0.758	0.779	0.767	0.738	0.772	0.774	0.763	0.753	0.689	0.766	0.71	0.767	0.854	0.779	0.762	0.612	0.683	0.78	0.775	0.746	0.662	0.771	0.772	0.772	0.774	0.766	0.781	0.724	0.788	0.774	0.764	0.613	0.78	0.809	0.779	0.747	0.774	0.747	0.787	0.794	0.801	0.76	0.878	0.777	0.756
T18	0.815	0.726	0.821	0.806	0.805	0.804	0.811	0.784	0.794	0.805	0.794	0.79	0.744	0.809	0.767	0.793	0.817	0.885	0.786	0.682	0.758	0.808	0.807	0.794	0.747	0.806	0.81	0.795	0.807	0.816	0.819	0.779	0.794	0.807	0.813	0.677	0.802	0.797	0.812	0.811	0.813	0.79	0.819	0.771	0.794	0.801	0.779	0.901	0.802
T19	0.799	0.708	0.808	0.775	0.771	0.796	0.786	0.749	0.792	0.788	0.769	0.758	0.677	0.785	0.74	0.8	0.807	0.785	0.88	0.647	0.739	0.801	0.796	0.748	0.726	0.8	0.775	0.801	0.799	0.783	0.802	0.753	0.755	0.802	0.791	0.604	0.79	0.779	0.816	0.767	0.79	0.749	0.821	0.746	0.778	0.777	0.772	0.809	0.885
T20	0.788	0.668	0.801	0.774	0.768	0.784	0.777	0.745	0.779	0.78	0.764	0.759	0.694	0.781	0.738	0.776	0.789	0.793	0.775	0.685	0.719	0.788	0.78	0.752	0.698	0.785	0.785	0.779	0.781	0.78	0.794	0.749	0.803	0.793	0.787	0.633	0.8	0.809	0.798	0.769	0.788	0.759	0.804	0.792	0.802	0.777	0.799	0.796	0.776
T21	0.795	0.665	0.807	0.771	0.769	0.794	0.78	0.737	0.79	0.793	0.766	0.755	0.683	0.778	0.728	0.79	0.798	0.792	0.793	0.623	0.773	0.794	0.787	0.745	0.689	0.796	0.784	0.797	0.787	0.781	0.809	0.735	0.804	0.808	0.798	0.615	0.81	0.82	0.81	0.766	0.785	0.77	0.817	0.795	0.805	0.793	0.815	0.808	0.772
T22	0.745	0.643	0.767	0.732	0.724	0.744	0.73	0.713	0.747	0.741	0.727	0.719	0.671	0.739	0.692	0.733	0.743	0.754	0.739	0.6	0.687	0.821	0.74	0.722	0.666	0.744	0.74	0.736	0.742	0.735	0.746	0.71	0.762	0.744	0.738	0.591	0.735	0.772	0.753	0.733	0.74	0.703	0.752	0.76	0.765	0.718	0.761	0.757	0.752
T23	0.776	0.707	0.785	0.79	0.793	0.768	0.806	0.792	0.745	0.763	0.793	0.794	0.765	0.799	0.754	0.741	0.785	0.797	0.717	0.691	0.738	0.755	0.849	0.781	0.734	0.75	0.808	0.735	0.773	0.798	0.776	0.768	0.76	0.755	0.758	0.709	0.769	0.748	0.765	0.785	0.786	0.749	0.77	0.748	0.765	0.759	0.732	0.752	0.784
T24	0.775	0.678	0.78	0.757	0.754	0.764	0.761	0.737	0.752	0.754	0.75	0.742	0.68	0.766	0.722	0.753	0.782	0.771	0.746	0.643	0.709	0.776	0.769	0.815	0.695	0.756	0.763	0.753	0.767	0.767	0.796	0.741	0.792	0.765	0.809	0.671	0.794	0.776	0.79	0.762	0.783	0.797	0.793	0.733	0.763	0.807	0.748	0.787	0.754
T25	0.78	0.668	0.795	0.775	0.777	0.778	0.782	0.762	0.764	0.774	0.778	0.777	0.727	0.786	0.727	0.757	0.783	0.8	0.75	0.647	0.711	0.776	0.772	0.763	0.76	0.766	0.799	0.759	0.776	0.784	0.788	0.746	0.808	0.776	0.77	0.662	0.785	0.811	0.781	0.771	0.779	0.757	0.788	0.812	0.805	0.767	0.8	0.774	0.777
T26	0.807	0.723	0.829	0.802	0.787	0.8	0.801	0.778	0.793	0.799	0.781	0.774	0.729	0.805	0.776	0.791	0.813	0.808	0.793	0.679	0.77	0.817	0.803	0.789	0.758	0.893	0.801	0.79	0.8	0.809	0.812	0.791	0.781	0.801	0.812	0.665	0.798	0.782	0.818	0.813	0.806	0.767	0.821	0.751	0.781	0.793	0.767	0.818	0.814
T27	0.78	0.652	0.788	0.755	0.742	0.777	0.752	0.71	0.777	0.771	0.735	0.726	0.633	0.753	0.719	0.781	0.78	0.765	0.792	0.592	0.696	0.788	0.77	0.715	0.674	0.789	0.813	0.79	0.775	0.751	0.773	0.724	0.753	0.794	0.762	0.546	0.785	0.786	0.79	0.731	0.776	0.717	0.8	0.753	0.776	0.744	0.782	0.794	0.755
T28	0.78	0.701	0.789	0.785	0.782	0.764	0.788	0.77	0.743	0.752	0.766	0.774	0.718	0.792	0.772	0.749	0.792	0.793	0.73	0.687	0.752	0.772	0.769	0.765	0.748	0.756	0.793	0.812	0.78	0.792	0.775	0.787	0.752	0.763	0.772	0.685	0.779	0.74	0.782	0.791	0.794	0.746	0.79	0.721	0.75	0.763	0.72	0.767	0.78
T29	0.805	0.685	0.809	0.776	0.771	0.802	0.785	0.738	0.795	0.801	0.77	0.753	0.681	0.782	0.721	0.799	0.807	0.787	0.8	0.63	0.708	0.804	0.797	0.747	0.69	0.803	0.779	0.808	0.877	0.783	0.799	0.727	0.754	0.806	0.775	0.583	0.803	0.79	0.804	0.761	0.794	0.745	0.81	0.762	0.781	0.765	0.793	0.803	0.765
T30	0.771	0.656	0.785	0.761	0.765	0.771	0.773	0.746	0.767	0.766	0.762	0.764	0.694	0.769	0.722	0.766	0.778	0.785	0.754	0.62	0.702	0.774	0.769	0.739	0.685	0.766	0.778	0.767	0.775	0.84	0.771	0.732	0.79	0.775	0.755	0.616	0.772	0.808	0.779	0.75	0.757	0.732	0.789	0.798	0.793	0.747	0.797	0.776	0.771
[truncated: 41 more columns]
